# Supplementary material
Source: publisher figshare collection journal article supplement (https://gsapubs.figshare.com/ndownloader/files/23320946)
Supplement: Supplementary file 1 [file 23320946]

## Sheet: PlotDat4
Source sheet	Sheet1	107.875	0.0506201	60	0.0481481	160.661	0.0468189	111.435	0.0506201	105.472	0.0676529	99.0971	0.0508657	104.491	0.0491334	116.958	0.0682798	105.848	0.0489686	105.197	0.0498714	93.9345	0.050196	112.039	0.0577716	117.457	0.0950907	107.485	0.0524471	101.583	0.0492984	114.046	0.0463344	104.58	0.0614022	106.555	0.0468635	119.962	0.0590648	104.458	0.0498441	100.127	0.0597772	103.411	0.0490772	104.088	0.0493474	104.815	0.0554531
Plot name	Concordia1	100.301	0.0676529	60	0.0481481	142.754	0.0469169	111.367	0.0518285	105.373	0.0701678	99.0265	0.0524222	104.426	0.0500417	116.875	0.0694171	105.777	0.0498207	105.124	0.0512652	93.8345	0.0524282	111.954	0.0601508	117.335	0.100177	107.405	0.0541875	101.513	0.0505545	113.964	0.0475583	104.484	0.0647994	106.478	0.0479244	119.886	0.0602468	104.365	0.0513223	100.049	0.0608134	103.348	0.0501404	104.019	0.05048	104.734	0.0571354
Plot Type	1	95.4198	0.0508657	61.3765	0.0480999	128.429	0.0470152	111.164	0.0529905	105.079	0.0725861	98.8172	0.0539189	104.233	0.050915	116.628	0.0705106	105.566	0.05064	104.909	0.0526055	93.5384	0.0545745	111.704	0.0624385	116.974	0.105067	107.167	0.055861	101.306	0.0517623	113.721	0.0487352	104.201	0.0680661	106.251	0.0489445	119.661	0.0613834	104.088	0.0527436	99.8177	0.0618099	103.159	0.0511628	103.815	0.051569	104.495	0.058753
1st free col	89	101.112	0.0491334	62.8171	0.0480517	116.708	0.0471138	110.835	0.0540614	104.601	0.0748148	98.4774	0.0552983	103.921	0.0517198	116.226	0.0715185	105.224	0.0513952	104.56	0.0538407	93.0576	0.0565526	111.298	0.0645468	116.388	0.109574	106.781	0.0574033	100.969	0.0528755	113.325	0.0498198	103.741	0.0710767	105.883	0.0498846	119.296	0.0624309	103.64	0.0540535	99.442	0.0627282	102.853	0.052105	103.483	0.0525726	104.105	0.0602438
Sigma Level	2	112.613	0.0682798	64.3264	0.0480035	106.941	0.0472127	110.393	0.055	103.958	0.0767683	98.0201	0.0565073	103.501	0.0524253	115.686	0.0724019	104.764	0.052057	104.09	0.0549234	92.4105	0.0582864	110.751	0.0663948	115.598	0.113525	106.261	0.0587551	100.517	0.0538512	112.793	0.0507705	103.122	0.0737155	105.386	0.0507086	118.805	0.063349	103.036	0.0552016	98.9364	0.0635331	102.441	0.0529309	103.037	0.0534523	103.582	0.0615504
Absolute Errs	TRUE	102.145	0.0489686	65.9095	0.0479555	98.6764	0.0473119	109.853	0.0557704	103.174	0.0783714	97.4628	0.0574995	102.989	0.0530042	115.027	0.0731268	104.202	0.0526002	103.518	0.0558119	91.622	0.0597094	110.085	0.0679115	114.637	0.116767	105.628	0.0598646	99.9652	0.0546519	112.145	0.0515507	102.367	0.0758811	104.781	0.0513849	118.205	0.0641025	102.3	0.0561439	98.3203	0.0641937	101.94	0.0536087	102.494	0.0541743	102.943	0.0626228
Symbol Type	1	101.42	0.0498714	67.5717	0.0479075	91.5925	0.0474114	109.237	0.0563427	102.28	0.0795627	96.8271	0.0582368	102.405	0.0534344	114.276	0.0736656	103.562	0.0530038	102.865	0.0564721	90.7224	0.0607667	109.325	0.0690384	113.54	0.119176	104.905	0.0606889	99.336	0.0552469	111.406	0.0521305	101.507	0.0774903	104.091	0.0518874	117.522	0.0646624	101.46	0.056844	97.6174	0.0646845	101.367	0.0541123	101.874	0.0547108	102.215	0.0634197
Inverse Plot	TRUE	88.7311	0.050196	69.3194	0.0478595	85.4532	0.0475112	108.569	0.0566952	101.31	0.0802963	96.1373	0.0586908	101.771	0.0536993	113.46	0.0739973	102.867	0.0532524	102.157	0.0568787	89.7463	0.0614178	108.5	0.0697324	112.349	0.120659	104.121	0.0611966	98.6532	0.0556133	110.604	0.0524875	100.573	0.0784813	103.343	0.0521969	116.78	0.0650072	100.549	0.0572752	96.8547	0.0649868	100.746	0.0544224	101.202	0.0550411	101.425	0.0639104
Color Plot	TRUE	107.643	0.0577716	71.1591	0.0478117	80.0812	0.0476113	107.875	0.0568142	100.301	0.080544	95.4198	0.0588441	101.112	0.0537888	112.613	0.0741093	102.145	0.0533363	101.42	0.0570159	88.7311	0.0616376	107.643	0.0699667	111.111	0.12116	103.306	0.061368	97.9432	0.055737	109.769	0.052608	99.6016	0.0788159	102.564	0.0523014	116.009	0.0651236	99.6016	0.0574208	96.0615	0.0650889	100.1	0.0545271	100.503	0.0551527	100.604	0.064076
3D plot	FALSE	111.111	0.0950907	73.0984	0.0477639	75.3413	0.0477117	107.18	0.0566952	99.292	0.0802963	94.7024	0.0586908	100.453	0.0536993	111.765	0.0739973	101.423	0.0532524	100.683	0.0568787	87.716	0.0614178	106.785	0.0697324	109.873	0.120659	102.49	0.0611966	97.2332	0.0556133	108.935	0.0524875	98.6304	0.0784813	101.785	0.0521969	115.238	0.0650072	98.6541	0.0572752	95.2683	0.0649868	99.4541	0.0544224	99.8031	0.0550411	99.782	0.0639104
Linear	FALSE	103.306	0.0524471	75.1456	0.0477162	71.128	0.0478125	106.512	0.0563427	98.322	0.0795627	94.0126	0.0582368	99.8194	0.0534344	110.95	0.0736656	100.728	0.0530038	99.9746	0.0564721	86.7399	0.0607667	105.96	0.0690384	108.683	0.119176	101.706	0.0606889	96.5504	0.0552469	108.133	0.0521305	97.6966	0.0774903	101.037	0.0518874	114.497	0.0646624	97.7431	0.056844	94.5056	0.0646845	98.833	0.0541123	99.1306	0.0547108	98.9919	0.0634197
Data Range	F3:J42	97.9432	0.0492984	77.31	0.0476685	67.3582	0.0479135	105.897	0.0557704	97.4279	0.0783714	93.3769	0.0574995	99.2353	0.0530042	110.198	0.0731268	100.088	0.0526002	99.3217	0.0558119	85.8403	0.0597094	105.2	0.0679115	107.585	0.116767	100.984	0.0598646	95.9212	0.0546519	107.394	0.0515507	96.836	0.0758811	100.347	0.0513849	113.813	0.0641025	96.9034	0.0561439	93.8027	0.0641937	98.2606	0.0536087	98.5108	0.0541743	98.2638	0.0626228
Filled Symbols	TRUE	109.769	0.0463344	79.6019	0.0476209	63.9654	0.0480148	105.357	0.055	96.6443	0.0767683	92.8196	0.0565073	98.7234	0.0524253	109.54	0.0724019	99.5265	0.052057	98.7494	0.0549234	85.0518	0.0582864	104.534	0.0663948	106.624	0.113525	100.35	0.0587551	95.3696	0.0538512	106.745	0.0507705	96.0816	0.0737155	99.742	0.0507086	113.214	0.063349	96.1675	0.0552016	93.1866	0.0635331	97.7588	0.0529309	97.9675	0.0534523	97.6256	0.0615504
ConcAge	FALSE	99.6016	0.0614022	82.0328	0.0475734	60.8958	0.0481165	104.914	0.0540614	96.0012	0.0748148	92.3623	0.0552983	98.3032	0.0517198	108.999	0.0715185	99.066	0.0513952	98.2797	0.0538407	84.4047	0.0565526	103.987	0.0645468	105.835	0.109574	99.8306	0.0574033	94.917	0.0528755	106.214	0.0498198	95.4626	0.0710767	99.2457	0.0498846	112.722	0.0624309	95.5635	0.0540535	92.681	0.0627282	97.347	0.052105	97.5217	0.0525726	97.1018	0.0602438
ConcSwap	TRUE	102.564	0.0468635	84.616	0.047526	IsoLine	IsoLine	104.585	0.0529905	95.5233	0.0725861	92.0225	0.0539189	97.991	0.050915	108.598	0.0705106	98.7238	0.05064	97.9307	0.0526055	83.9239	0.0545745	103.581	0.0624385	105.248	0.105067	99.4443	0.055861	94.5807	0.0517623	105.818	0.0487352	95.0025	0.0680661	98.8768	0.0489445	112.357	0.0613834	95.1147	0.0527436	92.3052	0.0618099	97.0411	0.0511628	97.1904	0.051569	96.7127	0.058753
1st Symbol-row	1	116.009	0.0590648	87.3661	0.0474786			104.383	0.0518285	95.229	0.0701678	91.8132	0.0524222	97.7988	0.0500417	108.35	0.0694171	98.5131	0.0498207	97.7158	0.0512652	83.6278	0.0524282	103.331	0.0601508	104.887	0.100177	99.2065	0.0541875	94.3736	0.0505545	105.575	0.0475583	94.7193	0.0647994	98.6497	0.0479244	112.132	0.0602468	94.8383	0.0513223	92.0739	0.0608134	96.8526	0.0501404	96.9864	0.05048	96.473	0.0571354
		99.6016	0.0498441	90.2998	0.0474313			104.314	0.0506201	95.1297	0.0676529	91.7426	0.0508657	97.7339	0.0491334	108.267	0.0682798	98.4419	0.0489686	97.6433	0.0498714	83.5278	0.050196	103.247	0.0577716	104.765	0.0950907	99.1262	0.0524471	94.3037	0.0492984	105.493	0.0463344	94.6236	0.0614022	98.573	0.0468635	112.056	0.0590648	94.745	0.0498441	91.9958	0.0597772	96.789	0.0490772	96.9175	0.0493474	96.3921	0.0554531
		96.0615	0.0597772	93.4363	0.047384			104.383	0.0494117	95.229	0.065138	91.8132	0.0493092	97.7988	0.0482252	108.35	0.0671425	98.5131	0.0481165	97.7158	0.0484776	83.6278	0.0479639	103.331	0.0553925	104.887	0.0900049	99.2065	0.0507067	94.3736	0.0480422	105.575	0.0451105	94.7193	0.058005	98.6497	0.0458026	112.132	0.0578828	94.8383	0.048366	92.0739	0.0587409	96.8526	0.048014	96.9864	0.0482149	96.473	0.0537709
		100.1	0.0490772	96.7971	0.0473369			104.585	0.0482497	95.5233	0.0627197	92.0225	0.0478125	97.991	0.0473519	108.598	0.0660489	98.7238	0.0472971	97.9307	0.0471373	83.9239	0.0458175	103.581	0.0531048	105.248	0.0851144	99.4443	0.0490332	94.5807	0.0468344	105.818	0.0439336	95.0025	0.0547383	98.8768	0.0447825	112.357	0.0567462	95.1147	0.0469447	92.3052	0.0577445	97.0411	0.0469916	97.1904	0.0471258	96.7127	0.0521533
		100.503	0.0493474	100.407	0.0472898			104.914	0.0471789	96.0012	0.060491	92.3623	0.0464331	98.3032	0.0465471	108.999	0.0650411	99.066	0.046542	98.2797	0.0459021	84.4047	0.0438394	103.987	0.0509964	105.835	0.0806074	99.8306	0.0474909	94.917	0.0457212	106.214	0.0428489	95.4626	0.0517277	99.2457	0.0438424	112.722	0.0556987	95.5635	0.0456348	92.681	0.0568261	97.347	0.0460494	97.5217	0.0461222	97.1018	0.0506625
		100.604	0.0554531	104.296	0.0472427			105.357	0.0462402	96.6443	0.0585376	92.8196	0.0452241	98.7234	0.0458416	109.54	0.0641577	99.5265	0.0458801	98.7494	0.0448194	85.0518	0.0421056	104.534	0.0491484	106.624	0.0766569	100.35	0.0461391	95.3696	0.0447455	106.745	0.0418983	96.0816	0.0490889	99.742	0.0430183	113.214	0.0547805	96.1675	0.0444866	93.1866	0.0560212	97.7588	0.0452235	97.9675	0.0452425	97.6256	0.0493558
		110.742	0.0485922	108.496	0.0471958			105.897	0.0454699	97.4279	0.0569344	93.3769	0.0442318	99.2353	0.0452627	110.198	0.0634327	100.088	0.045337	99.3217	0.0439309	85.8403	0.0406827	105.2	0.0476318	107.585	0.0734148	100.984	0.0450296	95.9212	0.0439448	107.394	0.041118	96.836	0.0469233	100.347	0.0423421	113.813	0.054027	96.9034	0.0435444	93.8027	0.0553606	98.2606	0.0445458	98.5108	0.0445205	98.2638	0.0482834
		101.112	0.0594001	113.047	0.0471489			106.512	0.0448975	98.322	0.0557431	94.0126	0.0434946	99.8194	0.0448325	110.95	0.062894	100.728	0.0449333	99.9746	0.0432707	86.7399	0.0396254	105.96	0.0465049	108.683	0.0710058	101.706	0.0442052	96.5504	0.0433498	108.133	0.0405383	97.6966	0.0453141	101.037	0.0418396	114.497	0.0534671	97.7431	0.0428442	94.5056	0.0548698	98.833	0.0440421	99.1306	0.043984	98.9919	0.0474866
		104.167	0.0536396	117.995	0.047102			107.18	0.044545	99.292	0.0550095	94.7024	0.0430405	100.453	0.0445676	111.765	0.0625622	101.423	0.0446848	100.683	0.0428641	87.716	0.0389743	106.785	0.0458109	109.873	0.0695223	102.49	0.0436976	97.2332	0.0429834	108.935	0.0401813	98.6304	0.0443231	101.785	0.0415301	115.238	0.0531223	98.6541	0.0424131	95.2683	0.0545675	99.4541	0.043732	99.8031	0.0436537	99.782	0.0469959
		100.604	0.0503456	123.393	0.0470553			107.875	0.044426	100.301	0.0547619	95.4198	0.0428872	101.112	0.0444781	112.613	0.0624502	102.145	0.0446009	101.42	0.0427268	88.7311	0.0387545	107.643	0.0455766	111.111	0.0690214	103.306	0.0435262	97.9432	0.0428597	109.769	0.0400608	99.6016	0.0439885	102.564	0.0414256	116.009	0.0530059	99.6016	0.0422675	96.0615	0.0544655	100.1	0.0436273	100.503	0.0435421	100.604	0.0468302
		102.459	0.0501594	129.307	0.0470086			108.569	0.044545	101.31	0.0550095	96.1373	0.0430405	101.771	0.0445676	113.46	0.0625622	102.867	0.0446848	102.157	0.0428641	89.7463	0.0389743	108.5	0.0458109	112.349	0.0695223	104.121	0.0436976	98.6532	0.0429834	110.604	0.0401813	100.573	0.0443231	103.343	0.0415301	116.78	0.0531223	100.549	0.0424131	96.8547	0.0545675	100.746	0.043732	101.202	0.0436537	101.425	0.0469959
		109.769	0.0597889	135.814	0.0469619			109.237	0.0448975	102.28	0.0557431	96.8271	0.0434946	102.405	0.0448325	114.276	0.062894	103.562	0.0449333	102.865	0.0432707	90.7224	0.0396254	109.325	0.0465049	113.54	0.0710058	104.905	0.0442052	99.336	0.0433498	111.406	0.0405383	101.507	0.0453141	104.091	0.0418396	117.522	0.0534671	101.46	0.0428442	97.6174	0.0548698	101.367	0.0440421	101.874	0.043984	102.215	0.0474866
		99.4036	0.0670477	143.007	0.0469154			109.853	0.0454699	103.174	0.0569344	97.4628	0.0442318	102.989	0.0452627	115.027	0.0634327	104.202	0.045337	103.518	0.0439309	91.622	0.0406827	110.085	0.0476318	114.637	0.0734148	105.628	0.0450296	99.9652	0.0439448	112.145	0.041118	102.367	0.0469233	104.781	0.0423421	118.205	0.054027	102.3	0.0435444	98.3203	0.0553606	101.94	0.0445458	102.494	0.0445205	102.943	0.0482834
		116.959	0.0637049	151.002	0.0468689			110.393	0.0462402	103.958	0.0585376	98.0201	0.0452241	103.501	0.0458416	115.686	0.0641577	104.764	0.0458801	104.09	0.0448194	92.4105	0.0421056	110.751	0.0491484	115.598	0.0766569	106.261	0.0461391	100.517	0.0447455	112.793	0.0418983	103.122	0.0490889	105.386	0.0430183	118.805	0.0547805	103.036	0.0444866	98.9364	0.0560212	102.441	0.0452235	103.037	0.0452425	103.582	0.0493558
		98.0392	0.0519065	159.941	0.0468224			110.835	0.0471789	104.601	0.060491	98.4774	0.0464331	103.921	0.0465471	116.226	0.0650411	105.224	0.046542	104.56	0.0459021	93.0576	0.0438394	111.298	0.0509964	116.388	0.0806074	106.781	0.0474909	100.969	0.0457212	113.325	0.0428489	103.741	0.0517277	105.883	0.0438424	119.296	0.0556987	103.64	0.0456348	99.442	0.0568261	102.853	0.0460494	103.483	0.0461222	104.105	0.0506625
		103.842	0.0685352	170	0.0467761			111.164	0.0482497	105.079	0.0627197	98.8172	0.0478125	104.233	0.0473519	116.628	0.0660489	105.566	0.0472971	104.909	0.0471373	93.5384	0.0458175	111.704	0.0531048	116.974	0.0851144	107.167	0.0490332	101.306	0.0468344	113.721	0.0439336	104.201	0.0547383	106.251	0.0447825	119.661	0.0567462	104.088	0.0469447	99.8177	0.0577445	103.159	0.0469916	103.815	0.0471258	104.495	0.0521533
		143.062	0.0674427	170	0.0467761			111.367	0.0494117	105.373	0.065138	99.0265	0.0493092	104.426	0.0482252	116.875	0.0671425	105.777	0.0481165	105.124	0.0484776	93.8345	0.0479639	111.954	0.0553925	117.335	0.0900049	107.405	0.0507067	101.513	0.0480422	113.964	0.0451105	104.484	0.058005	106.478	0.0458026	119.886	0.0578828	104.365	0.048366	100.049	0.0587409	103.348	0.048014	104.019	0.0482149	104.734	0.0537709
		102.145	0.0536358	IsoLine	IsoLine			111.435	0.0506201	105.472	0.0676529	99.0971	0.0508657	104.491	0.0491334	116.958	0.0682798	105.848	0.0489686	105.197	0.0498714	93.9345	0.050196	112.039	0.0577716	117.457	0.0950907	107.485	0.0524471	101.583	0.0492984	114.046	0.0463344	104.58	0.0614022	106.555	0.0468635	119.962	0.0590648	104.458	0.0498441	100.127	0.0597772	103.411	0.0490772	104.088	0.0493474	104.815	0.0554531
		93.633	0.0611181					ErrEll	ErrEll	ErrEll	ErrEll	ErrEll	ErrEll	ErrEll	ErrEll	ErrEll	ErrEll	ErrEll	ErrEll	ErrEll	ErrEll	ErrEll	ErrEll	ErrEll	ErrEll	ErrEll	ErrEll	ErrEll	ErrEll	ErrEll	ErrEll	ErrEll	ErrEll	ErrEll	ErrEll	ErrEll	ErrEll	ErrEll	ErrEll	ErrEll	ErrEll	ErrEll	ErrEll	ErrEll	ErrEll	ErrEll	ErrEll	ErrEll	ErrEll
		96.6184	0.0630668
		105.263	0.12215
		99.7009	0.0535093
		78.2473	0.302479
		89.4454	0.100552
		105.708	0.0483768
		IsoLine	IsoLine
[truncated: 38 more columns]

## Sheet: PlotDat5
Source sheet	DataTable	107.875	0.0515	60	0.0481481	160.661	0.0468189	111.435	0.0515	105.472	0.07	99.0971	0.0512	104.491	0.0492	116.958	0.0675	105.848	0.048	105.197	0.0523	93.9345	0.0483	112.039	0.057	107.485	0.053	101.583	0.0503	114.046	0.0467	104.58	0.062	106.555	0.0465	119.962	0.0591	104.458	0.0498	100.127	0.0578	103.411	0.0488	104.088	0.0497	104.815	0.0559	114.794	0.0485
Plot name	Concordia4	100.301	0.07	60	0.0481481	142.754	0.0469169	111.367	0.0528371	105.373	0.0728652	99.0265	0.0528475	104.426	0.0501789	116.875	0.0687416	105.777	0.0489312	105.124	0.0538281	93.8345	0.0506638	111.954	0.0593877	107.405	0.0547191	101.513	0.0516371	113.964	0.0479416	104.484	0.0653427	106.478	0.0477177	119.886	0.0606759	104.365	0.0512565	100.049	0.0589222	103.348	0.0498506	104.019	0.0508222	104.734	0.057834	114.717	0.0495028
Plot Type	1	95.4198	0.0512	61.4194	0.0480984	128.429	0.0470152	111.164	0.0541228	105.079	0.0756203	98.8172	0.0544317	104.233	0.0511203	116.628	0.0699355	105.566	0.0498266	104.909	0.0552975	93.5384	0.0529367	111.704	0.0616836	107.167	0.0563722	101.306	0.0529228	113.721	0.0491355	104.201	0.068557	106.251	0.0488886	119.661	0.0621912	104.088	0.052657	99.8177	0.0600013	103.159	0.0508608	103.815	0.0519013	104.495	0.0596937	114.486	0.0504671
1st free col	93	101.112	0.0492	62.9071	0.0480487	116.708	0.0471138	110.835	0.0553077	104.601	0.0781594	98.4774	0.0558916	103.921	0.0519878	116.226	0.0710357	105.224	0.0506518	104.56	0.0566517	93.0576	0.0550315	111.298	0.0637995	106.781	0.0578956	100.969	0.0541077	113.325	0.0502357	103.741	0.0715193	105.883	0.0499677	119.296	0.0635877	103.64	0.0539477	99.442	0.0609958	102.853	0.0517918	103.483	0.0528958	104.105	0.0614076	114.112	0.0513558
Sigma Level	2	112.613	0.0675	64.468	0.0479991	106.941	0.0472127	110.393	0.0563463	103.958	0.0803849	98.0201	0.0571713	103.501	0.0527482	115.686	0.0720001	104.764	0.0513751	104.09	0.0578386	92.4105	0.0568676	110.751	0.0656541	106.261	0.0592309	100.517	0.0551463	112.793	0.0512001	103.122	0.0741157	105.386	0.0509136	118.805	0.0648117	103.036	0.055079	98.9364	0.0618674	102.441	0.0526078	103.037	0.0537674	103.582	0.0629098	113.608	0.0521347
Absolute Errs	TRUE	102.145	0.048	66.1077	0.0479496	98.6764	0.0473119	109.853	0.0571986	103.174	0.0822114	97.4628	0.0582215	102.989	0.0533722	115.027	0.0727916	104.202	0.0519687	103.518	0.0588127	91.622	0.0583744	110.085	0.0671761	105.628	0.0603268	99.9652	0.0559986	112.145	0.0519916	102.367	0.0762466	104.781	0.0516898	118.205	0.0658162	102.3	0.0560074	98.3203	0.0625828	101.94	0.0532775	102.494	0.0544828	102.943	0.0641427	112.993	0.052774
Symbol Type	1	101.42	0.0523	67.8323	0.0479002	91.5925	0.0474114	109.237	0.057832	102.28	0.0835685	96.8271	0.0590019	102.405	0.0538359	114.276	0.0733797	103.562	0.0524098	102.865	0.0595366	90.7224	0.059494	109.325	0.0683071	104.905	0.0611411	99.336	0.056632	111.406	0.0525797	101.507	0.07783	104.091	0.0522666	117.522	0.0665627	101.46	0.0566973	97.6174	0.0631143	101.367	0.0537751	101.874	0.0550143	102.215	0.0650588	112.293	0.053249
Inverse Plot	TRUE	88.7311	0.0483	69.6486	0.0478508	85.4532	0.0475112	108.569	0.058222	101.31	0.0844043	96.1373	0.0594825	101.771	0.0541215	113.46	0.0737419	102.867	0.0526814	102.157	0.0599823	89.7463	0.0601835	108.5	0.0690036	104.121	0.0616426	98.6532	0.057022	110.604	0.0529419	100.573	0.078805	103.343	0.0526218	116.78	0.0670224	100.549	0.0571222	96.8547	0.0634417	100.746	0.0540816	101.202	0.0553417	101.425	0.0656229	111.533	0.0535415
Color Plot	TRUE	107.643	0.057	71.5641	0.0478015	80.0812	0.0476113	107.875	0.0583537	100.301	0.0846865	95.4198	0.0596447	101.112	0.0542179	112.613	0.0738641	102.145	0.0527731	101.42	0.0601328	88.7311	0.0604163	107.643	0.0692387	103.306	0.0618119	97.9432	0.0571537	109.769	0.0530641	99.6016	0.0791342	102.564	0.0527418	116.009	0.0671776	99.6016	0.0572656	96.0615	0.0635522	100.1	0.054185	100.503	0.0554522	100.604	0.0658134	110.742	0.0536403
3D plot	FALSE	103.306	0.053	73.5872	0.0477523	75.3413	0.0477117	107.18	0.058222	99.292	0.0844043	94.7024	0.0594825	100.453	0.0541215	111.765	0.0737419	101.423	0.0526814	100.683	0.0599823	87.716	0.0601835	106.785	0.0690036	102.49	0.0616426	97.2332	0.057022	108.935	0.0529419	98.6304	0.078805	101.785	0.0526218	115.238	0.0670224	98.6541	0.0571222	95.2683	0.0634417	99.4541	0.0540816	99.8031	0.0553417	99.782	0.0656229	109.951	0.0535415
Linear	FALSE	97.9432	0.0503	75.7271	0.0477031	71.128	0.0478125	106.512	0.057832	98.322	0.0835685	94.0126	0.0590019	99.8194	0.0538359	110.95	0.0733797	100.728	0.0524098	99.9746	0.0595366	86.7399	0.059494	105.96	0.0683071	101.706	0.0611411	96.5504	0.056632	108.133	0.0525797	97.6966	0.07783	101.037	0.0522666	114.497	0.0665627	97.7431	0.0566973	94.5056	0.0631143	98.833	0.0537751	99.1306	0.0550143	98.9919	0.0650588	109.191	0.053249
Data Range	V7:Y42	109.769	0.0467	77.9943	0.047654	67.3582	0.0479135	105.897	0.0571986	97.4279	0.0822114	93.3769	0.0582215	99.2353	0.0533722	110.198	0.0727916	100.088	0.0519687	99.3217	0.0588127	85.8403	0.0583744	105.2	0.0671761	100.984	0.0603268	95.9212	0.0559986	107.394	0.0519916	96.836	0.0762466	100.347	0.0516898	113.813	0.0658162	96.9034	0.0560074	93.8027	0.0625828	98.2606	0.0532775	98.5108	0.0544828	98.2638	0.0641427	108.491	0.052774
Filled Symbols	TRUE	99.6016	0.062	80.4005	0.047605	63.9654	0.0480148	105.357	0.0563463	96.6443	0.0803849	92.8196	0.0571713	98.7234	0.0527482	109.54	0.0720001	99.5265	0.0513751	98.7494	0.0578386	85.0518	0.0568676	104.534	0.0656541	100.35	0.0592309	95.3696	0.0551463	106.745	0.0512001	96.0816	0.0741157	99.742	0.0509136	113.214	0.0648117	96.1675	0.055079	93.1866	0.0618674	97.7588	0.0526078	97.9675	0.0537674	97.6256	0.0629098	107.876	0.0521347
ConcAge	FALSE	102.564	0.0465	82.959	0.0475561	60.8958	0.0481165	104.914	0.0553077	96.0012	0.0781594	92.3623	0.0558916	98.3032	0.0519878	108.999	0.0710357	99.066	0.0506518	98.2797	0.0566517	84.4047	0.0550315	103.987	0.0637995	99.8306	0.0578956	94.917	0.0541077	106.214	0.0502357	95.4626	0.0715193	99.2457	0.0499677	112.722	0.0635877	95.5635	0.0539477	92.681	0.0609958	97.347	0.0517918	97.5217	0.0528958	97.1018	0.0614076	107.372	0.0513558
ConcSwap	FALSE	116.009	0.0591	85.6845	0.0475072	IsoLine	IsoLine	104.585	0.0541228	95.5233	0.0756203	92.0225	0.0544317	97.991	0.0511203	108.598	0.0699355	98.7238	0.0498266	97.9307	0.0552975	83.9239	0.0529367	103.581	0.0616836	99.4443	0.0563722	94.5807	0.0529228	105.818	0.0491355	95.0025	0.068557	98.8768	0.0488886	112.357	0.0621912	95.1147	0.052657	92.3052	0.0600013	97.0411	0.0508608	97.1904	0.0519013	96.7127	0.0596937	106.998	0.0504671
1st Symbol-row	1	99.6016	0.0498	88.5941	0.0474584			104.383	0.0528371	95.229	0.0728652	91.8132	0.0528475	97.7988	0.0501789	108.35	0.0687416	98.5131	0.0489312	97.7158	0.0538281	83.6278	0.0506638	103.331	0.0593877	99.2065	0.0547191	94.3736	0.0516371	105.575	0.0479416	94.7193	0.0653427	98.6497	0.0477177	112.132	0.0606759	94.8383	0.0512565	92.0739	0.0589222	96.8526	0.0498506	96.9864	0.0508222	96.473	0.057834	106.767	0.0495028
		96.0615	0.0578	91.707	0.0474097			104.314	0.0515	95.1297	0.07	91.7426	0.0512	97.7339	0.0492	108.267	0.0675	98.4419	0.048	97.6433	0.0523	83.5278	0.0483	103.247	0.057	99.1262	0.053	94.3037	0.0503	105.493	0.0467	94.6236	0.062	98.573	0.0465	112.056	0.0591	94.745	0.0498	91.9958	0.0578	96.789	0.0488	96.9175	0.0497	96.3921	0.0559	106.689	0.0485
		100.1	0.0488	95.0453	0.047361			104.383	0.0501629	95.229	0.0671348	91.8132	0.0495525	97.7988	0.0482211	108.35	0.0662584	98.5131	0.0470688	97.7158	0.0507719	83.6278	0.0459362	103.331	0.0546123	99.2065	0.0512809	94.3736	0.0489629	105.575	0.0454584	94.7193	0.0586573	98.6497	0.0452823	112.132	0.0575241	94.8383	0.0483435	92.0739	0.0566778	96.8526	0.0477494	96.9864	0.0485778	96.473	0.053966	106.767	0.0474972
		100.503	0.0497	98.6344	0.0473125			104.585	0.0488772	95.5233	0.0643797	92.0225	0.0479683	97.991	0.0472797	108.598	0.0650645	98.7238	0.0461734	97.9307	0.0493025	83.9239	0.0436633	103.581	0.0523164	99.4443	0.0496278	94.5807	0.0476772	105.818	0.0442645	95.0025	0.055443	98.8768	0.0441114	112.357	0.0560088	95.1147	0.046943	92.3052	0.0555987	97.0411	0.0467392	97.1904	0.0474987	96.7127	0.0521063	106.998	0.0465329
		100.604	0.0559	102.504	0.047264			104.914	0.0476923	96.0012	0.0618406	92.3623	0.0465084	98.3032	0.0464122	108.999	0.0639643	99.066	0.0453482	98.2797	0.0479483	84.4047	0.0415685	103.987	0.0502005	99.8306	0.0481044	94.917	0.0464923	106.214	0.0431643	95.4626	0.0524807	99.2457	0.0430323	112.722	0.0546123	95.5635	0.0456523	92.681	0.0546042	97.347	0.0458082	97.5217	0.0465042	97.1018	0.0503924	107.372	0.0456442
		110.742	0.0485	106.687	0.0472155			105.357	0.0466537	96.6443	0.0596151	92.8196	0.0452287	98.7234	0.0456518	109.54	0.0629999	99.5265	0.0446249	98.7494	0.0467614	85.0518	0.0397324	104.534	0.0483459	100.35	0.0467691	95.3696	0.0454537	106.745	0.0421999	96.0816	0.0498843	99.742	0.0420864	113.214	0.0533883	96.1675	0.044521	93.1866	0.0537326	97.7588	0.0449922	97.9675	0.0456326	97.6256	0.0488902	107.876	0.0448653
		101.112	0.062	111.225	0.0471672			105.897	0.0458014	97.4279	0.0577886	93.3769	0.0441785	99.2353	0.0450278	110.198	0.0622084	100.088	0.0440313	99.3217	0.0457873	85.8403	0.0382256	105.2	0.0468239	100.984	0.0456732	95.9212	0.0446014	107.394	0.0414084	96.836	0.0477534	100.347	0.0413102	113.813	0.0523838	96.9034	0.0435926	93.8027	0.0530172	98.2606	0.0443225	98.5108	0.0449172	98.2638	0.0476573	108.491	0.044226
		104.167	0.0543	116.164	0.0471189			106.512	0.045168	98.322	0.0564315	94.0126	0.0433981	99.8194	0.0445641	110.95	0.0616203	100.728	0.0435902	99.9746	0.0450634	86.7399	0.037106	105.96	0.0456929	101.706	0.0448589	96.5504	0.043968	108.133	0.0408203	97.6966	0.04617	101.037	0.0407334	114.497	0.0516373	97.7431	0.0429027	94.5056	0.0524857	98.833	0.0438249	99.1306	0.0443857	98.9919	0.0467412	109.191	0.043751
		100.604	0.053	121.56	0.0470707			107.18	0.044778	99.292	0.0555957	94.7024	0.0429175	100.453	0.0442785	111.765	0.0612581	101.423	0.0433186	100.683	0.0446177	87.716	0.0364165	106.785	0.0449964	102.49	0.0443574	97.2332	0.043578	108.935	0.0404581	98.6304	0.045195	101.785	0.0403782	115.238	0.0511776	98.6541	0.0424778	95.2683	0.0521583	99.4541	0.0435184	99.8031	0.0440583	99.782	0.0461771	109.951	0.0434585
		102.459	0.051	127.479	0.0470225			107.875	0.0446463	100.301	0.0553135	95.4198	0.0427553	101.112	0.0441821	112.613	0.0611359	102.145	0.0432269	101.42	0.0444672	88.7311	0.0361837	107.643	0.0447613	103.306	0.0441881	97.9432	0.0434463	109.769	0.0403359	99.6016	0.0448658	102.564	0.0402582	116.009	0.0510224	99.6016	0.0423344	96.0615	0.0520478	100.1	0.043415	100.503	0.0439478	100.604	0.0459866	110.742	0.0433597
		109.769	0.0596	134.002	0.0469744			108.569	0.044778	101.31	0.0555957	96.1373	0.0429175	101.771	0.0442785	113.46	0.0612581	102.867	0.0433186	102.157	0.0446177	89.7463	0.0364165	108.5	0.0449964	104.121	0.0443574	98.6532	0.043578	110.604	0.0404581	100.573	0.045195	103.343	0.0403782	116.78	0.0511776	100.549	0.0424778	96.8547	0.0521583	100.746	0.0435184	101.202	0.0440583	101.425	0.0461771	111.533	0.0434585
		99.4036	0.07	141.226	0.0469264			109.237	0.045168	102.28	0.0564315	96.8271	0.0433981	102.405	0.0445641	114.276	0.0616203	103.562	0.0435902	102.865	0.0450634	90.7224	0.037106	109.325	0.0456929	104.905	0.0448589	99.336	0.043968	111.406	0.0408203	101.507	0.04617	104.091	0.0407334	117.522	0.0516373	101.46	0.0429027	97.6174	0.0524857	101.367	0.0438249	101.874	0.0443857	102.215	0.0467412	112.293	0.043751
		116.959	0.0651	149.269	0.0468785			109.853	0.0458014	103.174	0.0577886	97.4628	0.0441785	102.989	0.0450278	115.027	0.0622084	104.202	0.0440313	103.518	0.0457873	91.622	0.0382256	110.085	0.0468239	105.628	0.0456732	99.9652	0.0446014	112.145	0.0414084	102.367	0.0477534	104.781	0.0413102	118.205	0.0523838	102.3	0.0435926	98.3203	0.0530172	101.94	0.0443225	102.494	0.0449172	102.943	0.0476573	112.993	0.044226
		98.0392	0.056	158.28	0.0468307			110.393	0.0466537	103.958	0.0596151	98.0201	0.0452287	103.501	0.0456518	115.686	0.0629999	104.764	0.0446249	104.09	0.0467614	92.4105	0.0397324	110.751	0.0483459	106.261	0.0467691	100.517	0.0454537	112.793	0.0421999	103.122	0.0498843	105.386	0.0420864	118.805	0.0533883	103.036	0.044521	98.9364	0.0537326	102.441	0.0449922	103.037	0.0456326	103.582	0.0488902	113.608	0.0448653
		103.842	0.068	168.445	0.0467829			110.835	0.0476923	104.601	0.0618406	98.4774	0.0465084	103.921	0.0464122	116.226	0.0639643	105.224	0.0453482	104.56	0.0479483	93.0576	0.0415685	111.298	0.0502005	106.781	0.0481044	100.969	0.0464923	113.325	0.0431643	103.741	0.0524807	105.883	0.0430323	119.296	0.0546123	103.64	0.0456523	99.442	0.0546042	102.853	0.0458082	103.483	0.0465042	104.105	0.0503924	114.112	0.0456442
		143.062	0.066	180	0.0467351			111.164	0.0488772	105.079	0.0643797	98.8172	0.0479683	104.233	0.0472797	116.628	0.0650645	105.566	0.0461734	104.909	0.0493025	93.5384	0.0436633	111.704	0.0523164	107.167	0.0496278	101.306	0.0476772	113.721	0.0442645	104.201	0.055443	106.251	0.0441114	119.661	0.0560088	104.088	0.046943	99.8177	0.0555987	103.159	0.0467392	103.815	0.0474987	104.495	0.0521063	114.486	0.0465329
		102.145	0.0533	180	0.0467351			111.367	0.0501629	105.373	0.0671348	99.0265	0.0495525	104.426	0.0482211	116.875	0.0662584	105.777	0.0470688	105.124	0.0507719	93.8345	0.0459362	111.954	0.0546123	107.405	0.0512809	101.513	0.0489629	113.964	0.0454584	104.484	0.0586573	106.478	0.0452823	119.886	0.0575241	104.365	0.0483435	100.049	0.0566778	103.348	0.0477494	104.019	0.0485778	104.734	0.053966	114.717	0.0474972
		93.633	0.059	IsoLine	IsoLine			111.435	0.0515	105.472	0.07	99.0971	0.0512	104.491	0.0492	116.958	0.0675	105.848	0.048	105.197	0.0523	93.9345	0.0483	112.039	0.057	107.485	0.053	101.583	0.0503	114.046	0.0467	104.58	0.062	106.555	0.0465	119.962	0.0591	104.458	0.0498	100.127	0.0578	103.411	0.0488	104.088	0.0497	104.815	0.0559	114.794	0.0485
		96.6184	0.0648					ErrEll	ErrEll	ErrEll	ErrEll	ErrEll	ErrEll	ErrEll	ErrEll	ErrEll	ErrEll	ErrEll	ErrEll	ErrEll	ErrEll	ErrEll	ErrEll	ErrEll	ErrEll	ErrEll	ErrEll	ErrEll	ErrEll	ErrEll	ErrEll	ErrEll	ErrEll	ErrEll	ErrEll	ErrEll	ErrEll	ErrEll	ErrEll	ErrEll	ErrEll	ErrEll	ErrEll	ErrEll	ErrEll	ErrEll	ErrEll	ErrEll	ErrEll
		99.7009	0.0543
		105.708	0.0483
		IsoLine	IsoLine
[truncated: 42 more columns]

## Sheet: PlotDat6
Source sheet	DataTable	0.2	61.0414	1	59.0378	1.91636	8	71.9283	3.57005	0.85	57.1214
Plot name	Average5	36.8	61.0414	2	62.1032	2.87317	31	43.6887	1.34465	1.15	57.1214
Plot Type	15			3	66.89	2.42443	IsoLine	IsoLine	IsoLine	1.15	60.9541
1st free col	11			4	62.9332	1.97904				0.85	60.9541
Sigma Level	2			5	55.7152	1.6617				0.85	57.1214
Absolute Errs	TRUE			6	62.614	1.97914				ErrBox	ErrBox
Symbol Type	1			7	62.8693	2.17058				1.85	59.23
Inverse Plot	FALSE			9	58.8461	2.6191				2.15	59.23
Color Plot	TRUE			10	60.9538	2.3628				2.15	64.9764
3D plot	FALSE			11	64.2098	2.17013				1.85	64.9764
Linear	FALSE			12	58.3989	2.04432				1.85	59.23
Data Range	AP7:AQ42			13	63.0609	2.87274				ErrBox	ErrBox
Filled Symbols	TRUE			14	62.4863	2.17071				2.85	64.4656
ConcAge	FALSE			15	54.5008	1.85378				3.15	64.4656
ConcSwap	FALSE			16	64.0822	2.61697				3.15	69.3145
1st Symbol-row	1			17	65.6139	2.42491				2.85	69.3145
				18	64.0822	1.7872				2.85	64.4656
				19	63.8269	1.97876				ErrBox	ErrBox
				20	63.1247	2.55352				3.85	60.9541
				21	57.8878	1.78892				4.15	60.9541
				22	61.8478	4.278				4.15	64.9122
				23	60.5068	2.61842				3.85	64.9122
				24	62.8055	2.74517				3.85	60.9541
				25	62.2309	1.97925				ErrBox	ErrBox
				26	57.5045	1.59734				4.85	54.0535
				27	63.4439	3.38325				5.15	54.0535
				28	53.6058	1.9819				5.15	57.3769
				29	64.4652	2.74447				4.85	57.3769
				30	60.9538	2.93754				4.85	54.0535
				32	62.0394	2.36241				ErrBox	ErrBox
				33	66.7624	3.76432				5.85	60.6348
				34	64.9119	2.61663				6.15	60.6348
				35	64.2737	2.36159				6.15	64.5931
				36	60.6984	1.852				5.85	64.5931
				IsoLine	IsoLine	IsoLine	IsoLine			5.85	60.6348
										ErrBox	ErrBox
										6.85	60.6988
										7.15	60.6988
										7.15	65.0399
										6.85	65.0399
										6.85	60.6988
										ErrBox	ErrBox
										8.85	56.227
										9.15	56.227
										9.15	61.4652
										8.85	61.4652
										8.85	56.227
										ErrBox	ErrBox
										9.85	58.591
										10.15	58.591
										10.15	63.3166
										9.85	63.3166
										9.85	58.591
										ErrBox	ErrBox
										10.85	62.0397
										11.15	62.0397
										11.15	66.38
										10.85	66.38
										10.85	62.0397
										ErrBox	ErrBox
										11.85	56.3546
										12.15	56.3546
										12.15	60.4433
										11.85	60.4433
										11.85	56.3546
										ErrBox	ErrBox
										12.85	60.1881
										13.15	60.1881
										13.15	65.9336
										12.85	65.9336
										12.85	60.1881
										ErrBox	ErrBox
										13.85	60.3156
										14.15	60.3156
										14.15	64.657
										13.85	64.657
										13.85	60.3156
										ErrBox	ErrBox
										14.85	52.647
										15.15	52.647
										15.15	56.3546
										14.85	56.3546
										14.85	52.647
										ErrBox	ErrBox
										15.85	61.4652
										16.15	61.4652
										16.15	66.6992
										15.85	66.6992
										15.85	61.4652
										ErrBox	ErrBox
										16.85	63.189
										17.15	63.189
										17.15	68.0388
										16.85	68.0388
										16.85	63.189
										ErrBox	ErrBox
										17.85	62.295
										18.15	62.295
										18.15	65.8694
										17.85	65.8694
										17.85	62.295
										ErrBox	ErrBox
										18.85	61.8481
										19.15	61.8481
										19.15	65.8056
										18.85	65.8056
										18.85	61.8481
										ErrBox	ErrBox
										19.85	60.5712
										20.15	60.5712
										20.15	65.6782
										19.85	65.6782
										19.85	60.5712
										ErrBox	ErrBox
										20.85	56.0989
										21.15	56.0989
										21.15	59.6768
										20.85	59.6768
										20.85	56.0989
										ErrBox	ErrBox
										21.85	57.5698
										22.15	57.5698
										22.15	66.1258
										21.85	66.1258
										21.85	57.5698
										ErrBox	ErrBox
										22.85	57.8884
										23.15	57.8884
										23.15	63.1252
										22.85	63.1252
										22.85	57.8884
										ErrBox	ErrBox
										23.85	60.0603
										24.15	60.0603
										24.15	65.5507
										23.85	65.5507
										23.85	60.0603
										ErrBox	ErrBox
										24.85	60.2516
										25.15	60.2516
										25.15	64.2102
										24.85	64.2102
										24.85	60.2516
										ErrBox	ErrBox
										25.85	55.9072
										26.15	55.9072
										26.15	59.1018
										25.85	59.1018
										25.85	55.9072
										ErrBox	ErrBox
										26.85	60.0606
										27.15	60.0606
										27.15	66.8271
										26.85	66.8271
										26.85	60.0606
										ErrBox	ErrBox
										27.85	51.6239
										28.15	51.6239
										28.15	55.5877
										27.85	55.5877
										27.85	51.6239
										ErrBox	ErrBox
										28.85	61.7207
										29.15	61.7207
										29.15	67.2096
										28.85	67.2096
										28.85	61.7207
										ErrBox	ErrBox
										29.85	58.0163
										30.15	58.0163
										30.15	63.8914
										29.85	63.8914
										29.85	58.0163
										ErrBox	ErrBox
										31.85	59.6769
										32.15	59.6769
										32.15	64.4018
										31.85	64.4018
										31.85	59.6769
										ErrBox	ErrBox
										32.85	62.9981
										33.15	62.9981
										33.15	70.5268
										32.85	70.5268
										32.85	62.9981
										ErrBox	ErrBox
										33.85	62.2953
										34.15	62.2953
										34.15	67.5285
										33.85	67.5285
										33.85	62.2953
										ErrBox	ErrBox
										34.85	61.9121
										35.15	61.9121
										35.15	66.6353
										34.85	66.6353
										34.85	61.9121
										ErrBox	ErrBox
										35.85	58.8464
										36.15	58.8464
										36.15	62.5504
										35.85	62.5504
										35.85	58.8464
										ErrBox	ErrBox
										7.85	68.3583
										8.15	68.3583
										8.15	75.4984
										7.85	75.4984
										7.85	68.3583
										ErrBox	ErrBox
										30.85	42.344
										31.15	42.344
										31.15	45.0333
										30.85	45.0333
										30.85	42.344
										ErrBox	ErrBox

## Sheet: DataTable
																															GSA Data Repository Item 2020201 accompanies Villagómez, D., and Pindell, J., 2020, Cooling and uplift history of the Chiapas Massif and its influence on
																															sedimentation and deformation in the adjacent Sierra de Chiapas Basin, in Martens, U., and Molina Garza, R.S., eds., Southern and Central Mexico: Basement
																															Framework, Tectonic Evolution, and Provenance of Mesozoic–Cenozoic Basins: Geological Society of America Special Paper 546, https://doi.org/10.1130/2020.2546(17).
Granite 5-6-6					UNCORRECTED ISOTOPIC RATIOS								COMMON Pb CORRECTED								UNCORRECTED ISOTOPIC RATIOS				COMMON Pb CORRECTED				UNCORRECTED ISOTOPIC RATIOS						COMMON Pb CORRECTED
Analysis	AnalysisName	AnalysisType	U (ppm)	Th/U	Ratio 207Pb/235U	Error2S	Ratio 206Pb/238U	Error2S	rho	% Error 6/8 2S	% disc. (6/8-7/5)	Filter	Ratio 207Pb/235U	Error2S	Ratio 206Pb/238U	Error2S	rho	% Error 6/8 2S	% disc. (6/8-7/5)	Filter	Ratio 238U/206Pb	Error2S	Ratio 207Pb/206Pb	Error2S	Ratio 238U/206Pb	Error2S	Ratio 207Pb/206Pb	Error2S	206Pb/238U Age (Ma)	Error2S	207Pb/235U Age (Ma)	Error2S	207Pb/206Pb Age (Ma)	Error2S	206Pb/238U Age (Ma)	Error2S	207Pb/235U Age (Ma)	Error2S	207Pb/206Pb Age (Ma)	Error2S	"Best Age"	Unc 2S
	Zircon_40		325	0.466154	0.118	0.027	0.009	0.00042	0.203951	4.66667	96.0822	High Disc	0.0548	0.0019	0.00842	0.00029	0.99995	3.44418	0.219355		111.111	5.18519	0.093	0.015	118.765	4.09048	0.047169	4.9e-05	57.7601	2.68343	113.257	24.5218	1520	190	54.0533	1.85391	54.1719	1.829	57.8	2.5	54.0533	1.85391
	Zircon_66		48.2	0.265768	0.16	0.033	0.0095	0.00056	0.285805	5.89474	147.241	High Disc	0.0561	0.0041	0.0086	0.00065	0.99993	7.55814	0.396019		105.263	6.20499	0.116	0.024	116.279	8.78853	0.047232	6.8e-05	60.9538	3.57614	150.703	28.8859	2200	180	55.2039	4.15457	55.4225	3.94193	61	3.4	55.2039	4.15457
	Zircon_68		222	0.252252	0.533	0.059	0.01278	0.00054	0.381714	4.22535	429.89	High Disc	0.0536	0.003	0.00817	0.00049	0.99975	5.99755	1.06978		78.2473	3.30622	0.311	0.03	122.399	7.34094	0.047649	6.4e-05	81.8658	3.43725	433.799	39.0787	3540	190	52.4549	3.13325	53.0161	2.89118	81.9	3.2	52.4549	3.13325
	Zircon_69		41.9	0.687351	0.155	0.053	0.01118	0.00061	0.159567	5.45617	104.144	High Disc	0.0666	0.0053	0.01017	0.00085	0.99991	8.35792	0.363097		89.4454	4.8803	0.093	0.038	98.3284	8.21821	0.047445	9.8e-05	71.6733	3.88896	146.317	46.5933	2070	250	65.231	5.42446	65.4679	5.0455	71.7	4.9	65.231	5.42446
	Zircon_31_5-6-6		342	1.11696	0.0647	0.0067	0.00927	0.00025	0.260429	2.69687	7.01453		0.0597	0.0015	0.0092	0.0003	0.9843	3.26087	0.270868		107.875	2.90925	0.0515	0.0056	108.696	3.54442	0.047192	3e-05	59.4849	1.59685	63.6575	6.38966	590	140	59.0378	1.91636	58.8778	1.43727	58.9	1.5	59.0378	1.91636
	Zircon_32		205	0.970732	0.093	0.015	0.00997	0.00042	0.261184	4.21264	41.1849		0.0623	0.0027	0.00968	0.00045	0.71095	4.64876	1.18696		100.301	4.22531	0.07	0.012	103.306	4.80244	0.047278	4.9e-05	63.9545	2.68085	90.2942	13.9348	1000	130	62.1032	2.87317	61.3661	2.58075	63.3	2.5	62.1032	2.87317
	Zircon_33		228	0.938596	0.0735	0.0097	0.01048	0.00033	0.238599	3.14885	7.15132		0.0684	0.0024	0.01043	0.00038	0.70002	3.64334	0.433458		95.4198	3.00463	0.0512	0.0069	95.8773	3.49313	0.047362	3.4e-05	67.209	2.10532	72.0154	9.17486	580	110	66.89	2.42443	67.18	2.28091	67.5	1.7	66.89	2.42443
	Zircon_34		605	0.796694	0.067	0.0055	0.00989	0.00027	0.332567	2.73003	3.79028		0.0642	0.0016	0.00981	0.00031	0.89587	3.16004	0.393039		101.112	2.76039	0.0492	0.0041	101.937	3.22124	0.047275	3.2e-05	63.4439	1.72354	65.8486	5.23393	306	87	62.9332	1.97904	63.1805	1.5266	63.1	1.6	62.9332	1.97904
	Zircon_35		808	0.128218	0.0836	0.0064	0.00888	0.00028	0.411881	3.15315	43.0412		0.0564	0.0015	0.00868	0.00026	0.99998	2.99539	0.00771966		112.613	3.55085	0.0675	0.0052	115.207	3.45091	0.047154	3e-05	56.9933	1.78917	81.5239	5.99709	844	89	55.7152	1.6617	55.7109	1.44176	57	1.5	55.7152	1.6617
	Zircon_36		612	0.94281	0.0661	0.0052	0.00979	0.00029	0.376542	2.96221	3.481		0.0628	0.0017	0.00976	0.00031	0.91602	3.17623	1.22992		102.145	3.02575	0.048	0.0039	102.459	3.25433	0.047263	3e-05	62.8055	1.8514	64.9918	4.95262	294	82	62.614	1.97914	61.8439	1.62415	62.5	1.5	62.614	1.97914
	Zircon_37		369.8	0.52623	0.0678	0.0082	0.00986	0.0003	0.251571	3.0426	5.30767		0.0632	0.0019	0.0098	0.00034	0.99554	3.46939	1.02337		101.42	3.0858	0.0523	0.0064	102.041	3.54019	0.047275	3.1e-05	63.2524	1.9151	66.6096	7.79747	480	150	62.8693	2.17058	62.226	1.81455	63.1	1.6	62.8693	2.17058
	Zircon_38		124.8	0.457532	0.078	0.015	0.01127	0.00054	0.249157	4.79148	5.55839		0.0735	0.0037	0.01122	0.00056	0.99987	4.99109	0.12101		88.7311	4.25154	0.0483	0.0099	89.1266	4.44838	0.047457	6.3e-05	72.2471	3.44238	76.2629	14.1287	700	210	71.9283	3.57005	72.0154	3.49969	72.3	3.2	71.9283	3.57005
	Zircon_39		198.1	0.386169	0.074	0.013	0.00929	0.00031	0.189948	3.33692	21.5987		0.0597	0.0022	0.00917	0.00041	0.99991	4.4711	0.0539103		107.643	3.59195	0.057	0.01	109.051	4.87579	0.047205	3.1e-05	59.6126	1.98006	72.4882	12.2905	790	130	58.8461	2.6191	58.8778	2.108	59.6	1.6	58.8461	2.6191
	Zircon_41		280	0.821429	0.07	0.01	0.00968	0.00032	0.231405	3.30579	10.6214		0.0619	0.0021	0.0095	0.00037	0.99997	3.89474	0.0489298		103.306	3.41507	0.053	0.0072	105.263	4.09972	0.047254	3.5e-05	62.1032	2.04314	68.6994	9.48956	920	120	60.9538	2.3628	60.9837	2.00801	62.1	1.7	60.9538	2.3628
	Zircon_42		243	0.576132	0.0694	0.0077	0.01021	0.00031	0.273656	3.03624	4.03694		0.0664	0.0022	0.01001	0.00034	0.80976	3.3966	1.66266		97.9432	2.97379	0.0503	0.0056	99.9001	3.39321	0.047311	3.7e-05	65.4863	1.97825	68.1299	7.31106	516	77	64.2098	2.17013	65.2774	2.09475	64.9	1.9	64.2098	2.17013
	Zircon_43		347	0.420749	0.0582	0.0067	0.00911	0.00029	0.276521	3.18332	1.75029		0.0592	0.0018	0.0091	0.00032	0.99999	3.51648	0.000514084		109.769	3.49431	0.0467	0.0052	109.89	3.86427	0.047182	3.1e-05	58.4628	1.85264	57.4396	6.4289	262	82	58.3989	2.04432	58.3986	1.72554	58.5	1.6	58.3989	2.04432
	Zircon_44		77.1	0.64332	0.085	0.02	0.01004	0.00041	0.173556	4.08367	28.623		0.065	0.0028	0.00983	0.00045	0.95515	4.57782	1.39974		99.6016	4.0674	0.062	0.014	101.729	4.65699	0.047306	5.2e-05	64.4013	2.61684	82.8349	18.7167	1010	160	63.0609	2.87274	63.9435	2.66955	64.7	2.6	63.0609	2.87274
	Zircon_45		303	1.05941	0.063	0.0063	0.00975	0.00031	0.317949	3.17949	0.823655		0.0642	0.002	0.00974	0.00034	0.64764	3.49076	1.11104		102.564	3.26101	0.0465	0.0051	102.669	3.58394	0.047264	4.1e-05	62.5501	1.97916	62.0349	6.01779	320	130	62.4863	2.17071	63.1805	1.90826	62.6	2.1	62.4863	2.17071
	Zircon_46		1090	0.394495	0.0702	0.0062	0.00862	0.00024	0.315246	2.78422	24.5022		0.0552	0.0015	0.00849	0.00029	0.99999	3.41578	0.102876		116.009	3.22996	0.0591	0.0066	117.786	4.0233	0.047121	2.4e-05	55.3317	1.53397	68.8892	5.88243	570	140	54.5008	1.85378	54.5569	1.4434	55.4	1.2	54.5008	1.85378
	Zircon_47		276	0.496014	0.069	0.009	0.01004	0.0004	0.305445	3.98406	5.19976		0.0645	0.0028	0.00999	0.00041	0.84345	4.1041	0.960434		99.6016	3.96819	0.0498	0.0061	100.1	4.10821	0.047296	5.3e-05	64.4013	2.55302	67.75	8.54859	450	150	64.0822	2.61697	63.4667	2.67081	64.2	2.7	64.0822	2.61697
	Zircon_48		299	0.548495	0.0858	0.0069	0.01041	0.00036	0.430021	3.45821	25.1951		0.0669	0.0023	0.01023	0.00038	0.95391	3.71457	0.212629		96.0615	3.32201	0.0578	0.0047	97.7517	3.63105	0.047345	4e-05	66.7624	2.29687	83.5833	6.45252	549	74	65.6139	2.42491	65.7534	2.18894	66.7	2	65.6139	2.42491
	Zircon_49		493	0.640974	0.0676	0.0064	0.00999	0.00027	0.285473	2.7027	3.64719		0.0652	0.0015	0.00999	0.00028	0.76517	2.8028	0.0811692		100.1	2.70541	0.0488	0.0044	100.1	2.80561	0.047296	2.7e-05	64.0822	1.72337	66.4194	6.08697	370	82	64.0822	1.7872	64.1342	1.42985	64.2	1.4	64.0822	1.7872
	Zircon_50		402	0.819652	0.0677	0.0068	0.00995	0.00029	0.290171	2.91457	4.2108		0.0652	0.0016	0.00995	0.00031	0.96247	3.11558	0.481512		100.503	2.92922	0.0497	0.0047	100.503	3.13123	0.047287	3e-05	63.8269	1.8511	66.5145	6.4668	350	120	63.8269	1.97876	64.1342	1.52517	63.8	1.5	63.8269	1.97876
	Zircon_51		412	0.495146	0.076	0.01	0.00994	0.00034	0.25996	3.42052	16.6464		0.0642	0.0021	0.00984	0.0004	0.99998	4.06504	0.0884513		100.604	3.44117	0.0559	0.0081	101.626	4.13114	0.047288	3.7e-05	63.763	2.17028	74.3773	9.43665	640	110	63.1247	2.55352	63.1805	2.00367	63.8	1.8	63.1247	2.55352
	Zircon_52		632	0.406646	0.0605	0.0046	0.00903	0.00027	0.393254	2.99003	2.9203		0.0588	0.0017	0.00902	0.00028	0.85807	3.10421	0.219863		110.742	3.31122	0.0485	0.0042	110.865	3.44148	0.047173	3.8e-05	57.9517	1.72501	59.6441	4.4043	270	110	57.8878	1.78892	58.0151	1.63029	58	1.9	57.8878	1.78892
	Zircon_53		89	0.524719	0.081	0.022	0.00989	0.00055	0.204752	5.56117	24.653		0.0629	0.0042	0.00964	0.00067	0.99995	6.95021	0.148101		101.112	5.62303	0.062	0.017	103.734	7.20976	0.047281	6.6e-05	63.4439	3.51092	79.0847	20.6646	1150	220	61.8478	4.278	61.9394	4.01224	63.4	3.3	61.8478	4.278
	Zircon_54		199	0.444221	0.071	0.011	0.0096	0.00038	0.255492	3.95833	13.0788		0.0608	0.0026	0.00943	0.00041	0.96867	4.34783	0.951136		104.167	4.12326	0.0543	0.0086	106.045	4.61063	0.047234	4.5e-05	61.5924	2.42642	69.648	10.4288	760	140	60.5068	2.61842	59.9313	2.48868	61.1	2.3	60.5068	2.61842
	Zircon_55		96.8	0.469008	0.069	0.018	0.00994	0.00044	0.169685	4.42656	6.25284		0.064	0.0027	0.00979	0.00043	0.92799	4.39224	0.293269		100.604	4.45328	0.053	0.013	102.145	4.48645	0.0473	5.4e-05	63.763	2.8086	67.75	17.0972	1010	250	62.8055	2.74517	62.9897	2.57663	64.4	2.7	62.8055	2.74517
	Zircon_56		1260	0.307937	0.0675	0.0057	0.00976	0.00031	0.376132	3.17623	5.92569		0.063	0.0017	0.0097	0.00031	0.98755	3.19588	0.314908		102.459	3.25433	0.051	0.0039	103.093	3.29472	0.04724	3.9e-05	62.614	1.97914	66.3243	5.42172	420	91	62.2309	1.97925	62.0349	1.62385	61.4	2	62.2309	1.97925
	Zircon_57		878	0.643508	0.0751	0.0059	0.00911	0.00026	0.363281	2.85401	25.7682		0.0583	0.0015	0.00896	0.00025	0.67503	2.79018	0.0539338		109.769	3.13283	0.0596	0.0043	111.607	3.11404	0.047167	3.6e-05	58.4628	1.66099	73.5276	5.57228	542	90	57.5045	1.59734	57.5355	1.43917	57.7	1.8	57.5045	1.59734
	Zircon_58		141.1	0.599575	0.093	0.016	0.01006	0.00053	0.306225	5.26839	39.9281		0.0645	0.0033	0.00989	0.00053	0.99996	5.35895	0.0360166		99.4036	5.23697	0.07	0.013	101.112	5.41855	0.047303	6.3e-05	64.529	3.38268	90.2942	14.8638	1030	170	63.4439	3.38325	63.4667	3.14774	64.5	3.2	63.4439	3.38325
	Zircon_59		354	0.232768	0.0751	0.0086	0.00855	0.00028	0.285979	3.27485	33.9684		0.054	0.0018	0.00835	0.00031	0.9424	3.71257	0.381147		116.959	3.83024	0.0651	0.0077	119.76	4.4462	0.047107	3.2e-05	54.8843	1.78975	73.5276	8.12231	830	140	53.6058	1.9819	53.4015	1.73405	54.6	1.6	53.6058	1.9819
	Zircon_60		199.5	0.650125	0.073	0.015	0.0102	0.00037	0.176536	3.62745	9.3544		0.0656	0.0024	0.01005	0.00043	0.99996	4.27861	0.0779898		98.0392	3.55632	0.056	0.011	99.5025	4.25732	0.04732	4.5e-05	65.4225	2.36117	71.5423	14.1945	590	180	64.4652	2.74447	64.5154	2.2869	65.4	2.3	64.4652	2.74447
	Zircon_61		254	0.433071	0.091	0.018	0.00963	0.00046	0.241491	4.77674	43.135		0.062	0.0028	0.0095	0.00046	0.99997	4.84211	0.205794		103.842	4.96027	0.068	0.011	105.263	5.09695	0.047248	5.3e-05	61.784	2.93716	88.4345	16.7524	1000	180	60.9538	2.93754	61.0793	2.67709	61.8	2.7	60.9538	2.93754
	Zircon_62		233	0.421888	0.065	0.012	0.00699	0.00025	0.193729	3.57654	42.397		0.0439	0.0012	0.0068	0.00021	0.99471	3.08824	0.146591		143.062	5.11665	0.066	0.011	147.059	4.54152	0.046921	2.7e-05	44.9051	1.60047	63.9435	11.4409	1170	150	43.6887	1.34465	43.6246	1.16722	45.2	1.4	43.6887	1.34465
	Zircon_63		295.4	1.12153	0.0724	0.0073	0.00979	0.00028	0.283655	2.86006	13.0067		0.063	0.0019	0.00967	0.00037	0.99998	3.82627	0.0071354		102.145	2.92141	0.0533	0.0061	103.413	3.95684	0.047269	3.3e-05	62.8055	1.78755	70.9744	6.91188	650	150	62.0394	2.36241	62.0349	1.81489	62.8	1.6	62.0394	2.36241
	Zircon_64		70.1	0.338088	0.09	0.021	0.01068	0.00055	0.220706	5.14981	27.7704		0.068	0.0037	0.01041	0.00059	0.99992	5.66763	0.0559009		93.633	4.82192	0.059	0.014	96.0615	5.44441	0.047382	6.4e-05	68.4849	3.50817	87.5034	19.5624	830	180	66.7624	3.76432	66.7998	3.51771	68.5	3.2	66.7624	3.76432
	Zircon_65		198	0.535354	0.09	0.015	0.01035	0.00039	0.226087	3.76812	31.8227		0.0661	0.0024	0.01012	0.00041	0.99996	4.05138	0.123003		96.6184	3.64069	0.0648	0.0094	98.8142	4.00334	0.04734	4.4e-05	66.3796	2.48843	87.5034	13.9732	780	140	64.9119	2.61663	64.9918	2.28583	66.4	2.2	64.9119	2.61663
	Zircon_67		238.4	0.954279	0.074	0.011	0.01003	0.00032	0.214629	3.19043	12.6686		0.0654	0.002	0.01002	0.00037	0.99996	3.69261	0.0795982		99.7009	3.18089	0.0543	0.0077	99.8004	3.68524	0.047299	3.4e-05	64.3375	2.04243	72.4882	10.3996	720	150	64.2737	2.36159	64.3248	1.90611	64.3	1.7	64.2737	2.36159
	Zircon_70_5-6-6		805	1.06335	0.0631	0.0057	0.00946	0.00026	0.304254	2.74841	2.35929		0.0617	0.0017	0.00946	0.00029	0.45939	3.06554	0.154882		105.708	2.9053	0.0483	0.0043	105.708	3.24053	0.04723	2.7e-05	60.6984	1.66041	62.1304	5.44416	272	81	60.6984	1.852	60.7924	1.62584	60.9	1.4	60.6984	1.852
											<50% Disc							<5% error
																		<10% discordancia

## Sheet: CNREE
	Analysis	AnalysisName	AnalysisType	Si	P	Ti	Y	Nb	Zr	La	Ce	Pr	Nd	Sm	Eu	Gd	Tb	Dy	Ho	Er	Yb	Lu	Hf	Th	U	Pb
44	44	Zircon_31_5-6-6	unknown	-0.0413827	-2.33988	0.0773885	1991.42	9.38726	20417.7	0.498393	73.487	9.86963	29.9725	155.336	159.542	490.321	743.863	1169.36	1910.15	2864.01	5515.34	6910.41	77234.5	10628.6	34665.9	1.46067
45	45	Zircon_32	unknown	3.59818	0.33394	0.0148406	787.069	5.0642	20417.7	0.110297	42.7068	1.40785	4.36986	29.3077	52.5417	155.869	254.601	419.775	682.11	1040.72	1961.07	2529.58	98708.1	4378.61	17919.7	0.844626
46	46	Zircon_33	unknown	3.43017	0.10908	0.0439558	1137.77	6.51567	20417.7	0.089589	42.056	1.91575	7.03404	48.0803	70.4417	207.544	345.996	572.952	980.679	1593.74	3331.03	4339.19	83873.7	6372.76	26488	1.18285
47	47	Zircon_34	unknown	3.46937	0.6408	0.0162627	1225.27	19.6321	20417.7	0.309407	75.5718	0.860159	3.97819	26.0574	21.5273	159.242	321.217	590.027	1102.62	1824.43	3825.61	4678.66	108238	12980.2	64840	2.66765
48	48	Zircon_35	unknown	3.66559	0.472583	-0.00235515	702.776	19.3774	20417.7	0.230028	35.9239	0.793832	1.61515	13.7274	10.5783	68.846	142.43	292.287	587.077	1091.96	2757.82	4206.42	185750	2800.02	81170.4	2.33094
50	50	Zircon_36	unknown	-0.0992612	-2.63178	-0.00606203	1078.5	18.199	20417.7	0.35853	83.2377	1.2746	3.61746	31.8186	35.4943	151.87	286.376	512.772	935.617	1561.49	3430.51	4418.69	107296	14913	68329.8	2.88892
51	51	Zircon_37	unknown	3.94166	0.942675	-0.00431721	956.083	19.2579	20417.7	0.169102	58.327	0.564431	2.4826	19.416	13.8282	103.009	216.822	426.964	842.629	1438.58	3245.9	3995.89	106450	5641.27	37233.3	1.47137
52	52	Zircon_38	unknown	3.42593	0.622409	0.0100525	523.127	7.32514	20417.7	0.128881	20.5288	0.739423	1.77435	10.1469	7.6297	49.6368	107.16	218.847	433.873	829.452	2170.02	2905.77	99918	1501.49	12619.8	0.567825
53	53	Zircon_39	unknown	3.69285	0.279602	0.944904	334.784	12.8918	20417.7	0.665518	15.8912	0.56632	1.3127	10.608	4.15896	40.2304	85.4489	154.451	291.278	494.806	1170.46	1549.65	100071	2076.21	19368	0.792576
54	54	Zircon_40	unknown	3.17707	0.278282	0.103223	775.018	21.415	20417.7	6.91596	51.7248	4.49936	4.63837	14.8686	9.50942	81.3278	179.927	346.209	659.44	1134.9	2424.95	3340.68	119657	4628.79	34827.5	1.78299
56	56	Zircon_41	unknown	-1.03393	-1.87999	0.0357472	1497.54	10.6617	20417.7	527.342	550.881	484.324	423.702	388.827	55.5875	517.192	641.68	872.642	1283.87	1900.89	3406.78	4360.04	96837.6	5798.99	29657.6	1.18831
57	57	Zircon_42	unknown	3.05147	0.442293	0.0107501	1061.32	6.87063	20417.7	-0.0189454	34.643	0.908478	3.1956	26.0337	19.6949	127.126	255.365	502.73	955.288	1593.57	3544.62	4454.42	111411	4212.76	30624.5	1.21183
58	58	Zircon_43	unknown	3.3596	0.498265	0.00227709	1030.58	23.0282	20417.7	0.229285	61.8224	0.905309	2.42243	17.2998	11.3244	105.014	215.746	448.634	879.705	1562.04	3511.52	4884.29	130295	5239.03	48386.2	1.69856
59	59	Zircon_44	unknown	3.29652	0.344265	0.02619	521.701	2.40133	20417.7	0.167695	11.2086	1.87253	5.93781	26.9059	29.0714	99.3817	165.995	276.542	479.476	760.596	1653.05	2172.22	82829.8	1515.9	8873.27	0.383012
60	60	Zircon_45	unknown	3.40741	0.581428	0.018359	450.761	6.55709	20417.7	0.159568	35.4812	0.785858	3.40889	13.8653	19.2223	70.4684	129.099	219.878	390.183	658.117	1464.86	1981.05	108794	8897.91	34280.2	1.49806
62	62	Zircon_46	unknown	-0.254276	-2.73894	2.81489	880.672	35.6155	20417.7	0.553922	49.8472	0.679662	1.71895	16.1851	4.02374	80.5525	183.746	366.808	728.526	1334.99	3273.56	4282.98	154184	9767.76	98858.1	3.27635
63	63	Zircon_47	unknown	3.5991	1.18695	0.0031089	911.581	7.1629	20417.7	0.22913	26.5839	0.743208	1.79547	18.5405	16.9041	96.8099	209.137	411.145	809.927	1396.12	3110.98	4000.14	103072	3715.74	27145.7	1.19094
64	64	Zircon_48	unknown	3.22811	0.320828	-0.00187231	840.471	17.4731	20417.7	0.0468992	51.3247	0.668993	2.26702	20.3344	12.5468	88.403	209.204	396.243	733.168	1250.63	2853.53	3550.56	113687	6669.17	45585.7	1.83817
65	65	Zircon_49	unknown	3.03385	0.14437	0.00989523	938.28	15.7707	20417.7	0.0422619	57.9348	0.750006	2.54881	21.834	13.5258	118.681	236.23	452.52	826.694	1390.86	2987.62	3654.11	117302	8380.51	51489.9	2.09448
66	66	Zircon_50	unknown	3.56795	0.63417	0.0362496	1786.48	15.8614	20417.7	0.0523851	61.3424	1.31056	5.43261	34.1337	57.3604	241.977	480.72	897.456	1604.14	2596.67	5218.02	6384.79	87631.3	8505.44	37292	1.63677
68	68	Zircon_51	unknown	-0.12593	-2.79955	0.0402825	681.154	16.561	20417.7	0.183142	41.7251	0.686988	1.91604	15.3854	13.4773	74.3788	155.086	307.834	591.203	1034.73	2396.94	3079.82	98151.8	3305.99	27062.7	1.06331
69	69	Zircon_52	unknown	3.33801	1.49234	0.013468	1720.12	38.8524	20417.7	1.71821	52.546	4.60203	10.3061	62.0047	39.148	280.032	479.25	849.822	1485.87	2326.44	4295.36	5376.95	98156.2	13736.6	82292.2	3.01554
70	70	Zircon_53	unknown	3.44428	0.227802	0.0409662	526.852	3.18175	20417.7	0.0508836	11.7111	1.08235	2.62143	14.5983	18.6746	68.4413	133.951	250.375	455.031	797.388	1868.61	2579.89	77532.7	1200.1	9421.11	0.374278
71	71	Zircon_54	unknown	3.53135	0.852728	-0.00053839	683.793	6.76848	20417.7	0.151718	20.1646	0.406776	2.23908	12.1541	9.54538	68.8232	150.774	308.656	602.049	1053.03	2481.34	3230.51	107894	2371.57	21652.7	0.854695
72	72	Zircon_55	unknown	3.56868	0.491168	0.00755245	667.534	4.25673	20417.7	0.157165	12.3569	0.864034	2.65806	16.5774	17.9523	65.3354	140.151	287.269	565.944	1012.64	2363.47	3243.59	74097.6	1285.7	10881.8	0.413733
74	74	Zircon_56	unknown	-0.142263	-2.27925	0.0991998	1242.7	37.4427	20417.7	0.150749	59.9817	0.758628	3.05979	24.1239	20.2845	129.241	274.746	545.114	1050.88	1822.48	4273.42	5607.32	119139	7445.57	91491.3	3.31137
75	75	Zircon_57	unknown	3.16775	-0.248961	0.034757	742.403	22.5871	20417.7	0.20252	53.7953	0.549827	2.64503	11.4123	7.20178	80.6977	160.246	313.018	600.622	1084.68	2411.71	3330.58	146179	14884.6	93339.8	3.3773
76	76	Zircon_58	unknown	3.3715	0.334323	0.01109	630.669	2.67469	20417.7	0.0686848	17.9235	1.39182	4.41708	24.6711	28.2515	94.4606	169.639	316.559	558.295	919.084	2140.91	2794.53	82361.1	2281.6	14220.7	0.628843
77	77	Zircon_59	unknown	4.25488	0.943201	0.0759685	870.013	15.4286	20417.7	0.135785	30.4712	0.902734	0.968778	13.9061	7.02892	71.0889	165.99	338.988	684.267	1268.73	3022.75	4557.18	147496	4400.53	74733.7	2.39646
78	78	Zircon_60	unknown	3.38036	0.261578	-0.00659059	644.949	2.7538	20417.7	0.107433	24.2939	1.50162	5.62622	33.2092	36.19	116.544	188.026	327.578	568.442	924.029	2020.63	2729.62	106741	2810.88	16626	0.699879
80	80	Zircon_61	unknown	-0.120672	-2.75277	0.0272316	590.577	9.18387	20417.7	6.018	28.3642	5.41843	4.33847	14.13	8.00327	66.6353	140.424	262.452	507.863	900.057	2134.7	2684.55	105863	2526.78	22869.5	0.909956
81	81	Zircon_62	unknown	3.38709	0.279592	0.0818564	677.459	7.57422	20417.7	0.442609	17.6536	2.52096	6.59318	31.0463	34.7769	117.082	189.273	337.121	582.19	972.714	2266.27	3132.51	107645	3362.36	34229.8	1.07153
82	82	Zircon_63	unknown	3.26828	1.16934	0.0593358	3385.72	18.5606	20417.7	0.720685	107.13	15.8041	55.2949	288.496	323.242	959.752	1488.44	2225.33	3193.15	4344.86	6900.84	7621.12	80441.6	9488.54	34828	1.52935
83	83	Zircon_64	unknown	3.46682	-0.0861024	-0.00943201	205.204	2.45061	20417.7	-0.0104562	11.6809	0.713847	1.34658	7.52905	7.6978	29.3295	53.4534	98.343	178.918	307.689	710.094	973.083	116190	752.108	7775.97	0.332203
84	84	Zircon_65	unknown	3.73714	0.791831	0.0117321	650.189	4.29861	20417.7	0.315447	19.7732	0.712291	2.08273	15.7175	14.5203	74.7456	158.444	300.988	564.99	984.475	2242.8	3002.2	93471.4	2326.94	17845.1	0.776067
86	86	Zircon_66	unknown	-0.556073	-2.94068	0.190955	345.793	3.20965	20417.7	1.29204	12.3754	2.63869	2.5059	11.9292	13.1882	45.4144	77.6708	142.68	286.36	488.5	1239.32	1810.24	101082	690.168	8326.99	0.340939
87	87	Zircon_67	unknown	3.51516	0.692896	0.0101617	1014.14	4.25133	20417.7	0.119844	36.7218	3.55376	12.8753	64.1488	82.9402	211.319	337.165	555.538	924.661	1439.69	2992.35	3934.45	92595.4	5695.21	25750.3	1.14704
88	88	Zircon_68	unknown	5.03319	0.813397	0.0229681	979.762	14.3259	20417.7	0.61958	40.7394	1.87676	2.54112	18.9107	9.16489	89.1395	184.591	389.586	773.177	1401.7	3394.24	5073.37	149714	5866.46	87445.1	6.36693
89	89	Zircon_69	unknown	3.60675	0.452248	0.046859	356.139	2.10056	20417.7	0.104092	12.644	0.977581	4.08348	20.2376	20.5885	73.4331	120.889	197.837	335.158	511.377	1027.76	1339.24	99064	658.923	4182.99	0.217709
90	90	Zircon_70_5-6-6	unknown	3.44421	0.679908	-0.00806641	1888.76	28.851	20417.7	0.179393	100.439	1.69082	6.81635	55.9137	68.0471	292.496	559.067	1000.28	1715.69	2695.72	5095.4	6301.73	95454	19222	73982.3	3.02798
	Analysis	AnalysisName	AnalysisType			U (ppm)	Th/U	"Best Age"	Filter	La	Ce	Pr	Nd	Sm	Eu	Gd	Tb	Dy	Ho	Er	Yb	Lu
54	54	Zircon_40	unknown			325	0.466154	54.0533	High Disc	6.91596	51.7248	4.49936	4.63837	14.8686	9.50942	81.3278	179.927	346.209	659.44	1134.9	2424.95	3340.68
86	86	Zircon_66	unknown			48.2	0.265768	55.2039	High Disc	1.29204	12.3754	2.63869	2.5059	11.9292	13.1882	45.4144	77.6708	142.68	286.36	488.5	1239.32	1810.24
88	88	Zircon_68	unknown			222	0.252252	52.4549	High Disc	0.61958	40.7394	1.87676	2.54112	18.9107	9.16489	89.1395	184.591	389.586	773.177	1401.7	3394.24	5073.37
89	89	Zircon_69	unknown			41.9	0.687351	65.231	High Disc	0.104092	12.644	0.977581	4.08348	20.2376	20.5885	73.4331	120.889	197.837	335.158	511.377	1027.76	1339.24
44	44	Zircon_31_5-6-6	unknown			342	1.11696	59.0378		0.498393	73.487	9.86963	29.9725	155.336	159.542	490.321	743.863	1169.36	1910.15	2864.01	5515.34	6910.41
45	45	Zircon_32	unknown			205	0.970732	62.1032		0.110297	42.7068	1.40785	4.36986	29.3077	52.5417	155.869	254.601	419.775	682.11	1040.72	1961.07	2529.58
46	46	Zircon_33	unknown			228	0.938596	66.89		0.089589	42.056	1.91575	7.03404	48.0803	70.4417	207.544	345.996	572.952	980.679	1593.74	3331.03	4339.19
47	47	Zircon_34	unknown			605	0.796694	62.9332		0.309407	75.5718	0.860159	3.97819	26.0574	21.5273	159.242	321.217	590.027	1102.62	1824.43	3825.61	4678.66
48	48	Zircon_35	unknown			808	0.128218	55.7152		0.230028	35.9239	0.793832	1.61515	13.7274	10.5783	68.846	142.43	292.287	587.077	1091.96	2757.82	4206.42
50	50	Zircon_36	unknown			612	0.94281	62.614		0.35853	83.2377	1.2746	3.61746	31.8186	35.4943	151.87	286.376	512.772	935.617	1561.49	3430.51	4418.69
51	51	Zircon_37	unknown			369.8	0.52623	62.8693		0.169102	58.327	0.564431	2.4826	19.416	13.8282	103.009	216.822	426.964	842.629	1438.58	3245.9	3995.89
52	52	Zircon_38	unknown			124.8	0.457532	71.9283		0.128881	20.5288	0.739423	1.77435	10.1469	7.6297	49.6368	107.16	218.847	433.873	829.452	2170.02	2905.77
53	53	Zircon_39	unknown			198.1	0.386169	58.8461		0.665518	15.8912	0.56632	1.3127	10.608	4.15896	40.2304	85.4489	154.451	291.278	494.806	1170.46	1549.65
56	56	Zircon_41	unknown			280	0.821429	60.9538		527.342	550.881	484.324	423.702	388.827	55.5875	517.192	641.68	872.642	1283.87	1900.89	3406.78	4360.04
57	57	Zircon_42	unknown			243	0.576132	64.2098		-0.0189454	34.643	0.908478	3.1956	26.0337	19.6949	127.126	255.365	502.73	955.288	1593.57	3544.62	4454.42
58	58	Zircon_43	unknown			347	0.420749	58.3989		0.229285	61.8224	0.905309	2.42243	17.2998	11.3244	105.014	215.746	448.634	879.705	1562.04	3511.52	4884.29
59	59	Zircon_44	unknown			77.1	0.64332	63.0609		0.167695	11.2086	1.87253	5.93781	26.9059	29.0714	99.3817	165.995	276.542	479.476	760.596	1653.05	2172.22
60	60	Zircon_45	unknown			303	1.05941	62.4863		0.159568	35.4812	0.785858	3.40889	13.8653	19.2223	70.4684	129.099	219.878	390.183	658.117	1464.86	1981.05
62	62	Zircon_46	unknown			1090	0.394495	54.5008		0.553922	49.8472	0.679662	1.71895	16.1851	4.02374	80.5525	183.746	366.808	728.526	1334.99	3273.56	4282.98
63	63	Zircon_47	unknown			276	0.496014	64.0822		0.22913	26.5839	0.743208	1.79547	18.5405	16.9041	96.8099	209.137	411.145	809.927	1396.12	3110.98	4000.14
64	64	Zircon_48	unknown			299	0.548495	65.6139		0.0468992	51.3247	0.668993	2.26702	20.3344	12.5468	88.403	209.204	396.243	733.168	1250.63	2853.53	3550.56
65	65	Zircon_49	unknown			493	0.640974	64.0822		0.0422619	57.9348	0.750006	2.54881	21.834	13.5258	118.681	236.23	452.52	826.694	1390.86	2987.62	3654.11
66	66	Zircon_50	unknown			402	0.819652	63.8269		0.0523851	61.3424	1.31056	5.43261	34.1337	57.3604	241.977	480.72	897.456	1604.14	2596.67	5218.02	6384.79
68	68	Zircon_51	unknown			412	0.495146	63.1247		0.183142	41.7251	0.686988	1.91604	15.3854	13.4773	74.3788	155.086	307.834	591.203	1034.73	2396.94	3079.82
69	69	Zircon_52	unknown			632	0.406646	57.8878		1.71821	52.546	4.60203	10.3061	62.0047	39.148	280.032	479.25	849.822	1485.87	2326.44	4295.36	5376.95
70	70	Zircon_53	unknown			89	0.524719	61.8478		0.0508836	11.7111	1.08235	2.62143	14.5983	18.6746	68.4413	133.951	250.375	455.031	797.388	1868.61	2579.89
71	71	Zircon_54	unknown			199	0.444221	60.5068		0.151718	20.1646	0.406776	2.23908	12.1541	9.54538	68.8232	150.774	308.656	602.049	1053.03	2481.34	3230.51
72	72	Zircon_55	unknown			96.8	0.469008	62.8055		0.157165	12.3569	0.864034	2.65806	16.5774	17.9523	65.3354	140.151	287.269	565.944	1012.64	2363.47	3243.59
74	74	Zircon_56	unknown			1260	0.307937	62.2309		0.150749	59.9817	0.758628	3.05979	24.1239	20.2845	129.241	274.746	545.114	1050.88	1822.48	4273.42	5607.32
75	75	Zircon_57	unknown			878	0.643508	57.5045		0.20252	53.7953	0.549827	2.64503	11.4123	7.20178	80.6977	160.246	313.018	600.622	1084.68	2411.71	3330.58
76	76	Zircon_58	unknown			141.1	0.599575	63.4439		0.0686848	17.9235	1.39182	4.41708	24.6711	28.2515	94.4606	169.639	316.559	558.295	919.084	2140.91	2794.53
77	77	Zircon_59	unknown			354	0.232768	53.6058		0.135785	30.4712	0.902734	0.968778	13.9061	7.02892	71.0889	165.99	338.988	684.267	1268.73	3022.75	4557.18
78	78	Zircon_60	unknown			199.5	0.650125	64.4652		0.107433	24.2939	1.50162	5.62622	33.2092	36.19	116.544	188.026	327.578	568.442	924.029	2020.63	2729.62
80	80	Zircon_61	unknown			254	0.433071	60.9538		6.018	28.3642	5.41843	4.33847	14.13	8.00327	66.6353	140.424	262.452	507.863	900.057	2134.7	2684.55
81	81	Zircon_62	unknown			233	0.421888	43.6887		0.442609	17.6536	2.52096	6.59318	31.0463	34.7769	117.082	189.273	337.121	582.19	972.714	2266.27	3132.51
82	82	Zircon_63	unknown			295.4	1.12153	62.0394		0.720685	107.13	15.8041	55.2949	288.496	323.242	959.752	1488.44	2225.33	3193.15	4344.86	6900.84	7621.12
83	83	Zircon_64	unknown			70.1	0.338088	66.7624		-0.0104562	11.6809	0.713847	1.34658	7.52905	7.6978	29.3295	53.4534	98.343	178.918	307.689	710.094	973.083
84	84	Zircon_65	unknown			198	0.535354	64.9119		0.315447	19.7732	0.712291	2.08273	15.7175	14.5203	74.7456	158.444	300.988	564.99	984.475	2242.8	3002.2
87	87	Zircon_67	unknown			238.4	0.954279	64.2737		0.119844	36.7218	3.55376	12.8753	64.1488	82.9402	211.319	337.165	555.538	924.661	1439.69	2992.35	3934.45
90	90	Zircon_70_5-6-6	unknown			805	1.06335	60.6984		0.179393	100.439	1.69082	6.81635	55.9137	68.0471	292.496	559.067	1000.28	1715.69	2695.72	5095.4	6301.73
									Cretácico-Terciario								Descartados
